# Supplementary material for: Relevance and Recommendations for the Application of Cardioplegic Solutions in Cardiopulmonary Bypass Surgery in Pigs
Source: MDPI journal article supplement (doi:10.3390/biomedicines9091279), 2021-09-21
Supplement: s1 [file s1]

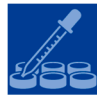

## Supplemental Tables

**Table S1.** Overview about investigations of cardioplegic solutions in adult pig models.

| Reference                | Study Groups                                                                                   | Ischemia | Ischemic Temperature | On-pump Reperfusion | Off-pump Reperfusion | Cardioplegic Solution | Main Findings                                                                                                                                                                                                                   |
|--------------------------|------------------------------------------------------------------------------------------------|----------|----------------------|---------------------|----------------------|-----------------------|---------------------------------------------------------------------------------------------------------------------------------------------------------------------------------------------------------------------------------|
| Demeekeul, 2021 [42]     | <i>n</i> = 3 St. Thomas II cardioplegia<br><i>n</i> = 3 St. Thomas II cardioplegia + GBR       | 20 min   | 32 °C                | 20-30 min           | 30 min               | St. Thomas II         | - GBR with cardioprotective effects against IRI<br>- GBR-supplemented cardioplegia induced lower lactate production level                                                                                                       |
| Hoyer, 2021 [31]         | <i>n</i> = 11 HTK cardioplegia<br><i>n</i> = 11 HTK cardioplegia + CsA                         | 90 min   | 34 °C                | 30 min              | 120 min              | HTK;<br>HTK + CsA     | - CsA supplementation enhanced the basal mitochondrial respiration thereby exerting a cardioprotective effect and diminishing IRI-induced damage<br>- CsA seems to preserve mitochondrial function via non-ROS related pathways |
| Nakao, 2020 [63]         | <i>n</i> = 7 Del Nido cardioplegia + PlasmaLyte<br><i>n</i> = 7 Del Nido cardioplegia          | 90 min   | 30 °C                | 30 min              | 30-60 min            | Del Nido              | - modified Del Nido cardioplegia comparable with the original Del Nido cardioplegia                                                                                                                                             |
| Suarez-Pierre, 2020 [43] | <i>n</i> = 6 St. Thomas II cardioplegia<br><i>n</i> = 6 St. Thomas II cardioplegia + diazoxide | 120 min  | 32 °C                | 60 min              | none                 | St. Thomas II         | - diazoxide preserves systolic and diastolic ventricular function<br>- diazoxide allows safer prolonged ischemic times                                                                                                          |
| Feirer, 2020 [25]        | <i>n</i> = 10 HTK cardioplegia<br><i>n</i> = 10 HTK-N cardioplegia                             | 90 min   | n.a.                 | 120 min             | none                 | HTK;<br>HTK-N         | - HTK-N cardioplegia stabilized hemoglobin and Ca <sup>2+</sup> levels → better kidney function                                                                                                                                 |

|                   |                                                                                             |         |       |         |         |                                |                                                                                                                                                                                               |
|-------------------|---------------------------------------------------------------------------------------------|---------|-------|---------|---------|--------------------------------|-----------------------------------------------------------------------------------------------------------------------------------------------------------------------------------------------|
|                   |                                                                                             |         |       |         |         |                                | - HTK-N with a trend for diminished AKI-related proximal tubule swelling and cytochrome c release                                                                                             |
| Santer, 2019 [21] | $n = 6$ St. Thomas I cardioplegia<br>$n = 7$ St. Thomas II cardioplegia                     | 60 min  | n.a.  | 60 min  | 120 min | St. Thomas I;<br>St. Thomas II | - polarized cardiac arrest with similar myocardial protection and enhanced functional recovery                                                                                                |
| Hoyer, 2019 [26]  | $n = 10$ HTK cardioplegia<br>$n = 10$ HTK-N cardioplegia<br>$n = 10$ HTK cardioplegia + CsA | 90 min  | 34 °C | 120 min | none    | HTK;<br>HTK-N;<br>HTK + CsA    | - HTK-N with fewer cerebral effects and less inflammation during CPB surgery than HTK and HTK + CsA cardioplegia → HTK-N could exert brain protective effects                                 |
| Aass, 2018 [22]   | $n = 10$ St. Thomas I cardioplegia<br>$n = 10$ St. Thomas II cardioplegia                   | 120 min | 34 °C | 10 min  | 240 min | St. Thomas I;<br>St. Thomas II | - better myocardial contractile efficiency with polarizing cardioplegia (St. Thomas I) than with St. Thomas II                                                                                |
| Aass, 2017 [23]   | $n = 10$ St. Thomas I cardioplegia<br>$n = 10$ St. Thomas II cardioplegia                   | 60 min  | 35 °C | 10 min  | 180 min | St. Thomas I;<br>St. Thomas II | - improved energy status and myocardial function with St. Thomas I cardioplegia than with St. Thomas II cardioplegia                                                                          |
| Aass, 2016 [24]   | $n = 10$ St. Thomas I cardioplegia<br>$n = 10$ St. Thomas II cardioplegia                   | 60 min  | 34 °C | 10 min  | 180 min | St. Thomas I;<br>St. Thomas II | - comparable myocardial protection for St. Thomas I cardioplegia with esmolol, adenosine and $Mg^{2+}$ and St. Thomas II<br>- improved LV contractile function with St. Thomas I cardioplegia |
| Dahle, 2015 [64]  | $n = 24$ blood cardioplegia                                                                 | 100 min | 35 °C | 20 min  | 180 min | blood                          | - esmolol added to blood cardioplegia preserved systolic cardiac function during the first 3 h after reperfusion                                                                              |

|                             |                                                                                                                                                                                                                                                                                                 |        |          |         |         |                                |                                                                                                                                                                                                                                                                                                                                                                                       |
|-----------------------------|-------------------------------------------------------------------------------------------------------------------------------------------------------------------------------------------------------------------------------------------------------------------------------------------------|--------|----------|---------|---------|--------------------------------|---------------------------------------------------------------------------------------------------------------------------------------------------------------------------------------------------------------------------------------------------------------------------------------------------------------------------------------------------------------------------------------|
| Portilla-de Buen, 2011 [57] | <p><math>n = 4</math> HTK cardioplegia</p> <p><math>n = 4</math> Braile miniplegia</p> <p><math>n = 4</math> control (with CPB, w/o cardioplegia and ischemia)</p>                                                                                                                              | 60 min | 36–38 °C | 120 min | none    | Braile (Miniplegia); HTK       | <ul style="list-style-type: none"> <li>- miniplegia and HTK cardioplegia with good myocardial protection</li> <li>- Braile miniplegia with lower postreperfusion coronary vascular resistance, but with reduction of systemic concentrations of cardioplegic components</li> <li>- HTK yielded higher <math>K^+</math> and lower <math>Na^{2+}</math> blood concentrations</li> </ul> |
| Wu, 2011 [28]               | <p><math>n = 5</math> St. Thomas II cardioplegia</p> <p><math>n = 5</math> St. Thomas II cardioplegia + pentazocine</p> <p><math>n = 5</math> St. Thomas II cardioplegia + adenosine + lidocaine</p> <p><math>n = 5</math> St. Thomas II cardioplegia + adenosine + lidocaine + pentazocine</p> | 60 min | 32–34 °C | 20 min  | 120 min | St. Thomas II                  | <ul style="list-style-type: none"> <li>- adenosin/lidocain/pentazocine cold crystalloid cardioplegia showed best myocardial protection and improved prolonged postoperative cardiac function</li> </ul>                                                                                                                                                                               |
| Osipov, 2010 [40]           | <p><math>n = 6</math> crystalloid cardioplegia + <math>H_2S</math> as infusion</p> <p><math>n = 6</math> crystalloid cardioplegia + <math>H_2S</math> as bolus/infusion</p> <p><math>n = 9</math> crystalloid cardioplegia + placebo</p>                                                        | 60 min | n.a.     | n.a.    | 120 min | crystalloid cardioplegia       | <ul style="list-style-type: none"> <li>- <math>H_2S</math> treatment may offer myocardial protection via attenuation of caspase-independent apoptosis and autophagy</li> </ul>                                                                                                                                                                                                        |
| Ryou, 2010 [32]             | <p><math>n = 8</math> cardioplegia + pyruvate</p> <p><math>n = 8</math> cardioplegia</p> <p><math>n = 8</math> w/o cardiac arrest and cardioplegia</p>                                                                                                                                          | 60 min | n.a.     | 30 min  | 240 min | 4:1 blood:crystalloid solution | <ul style="list-style-type: none"> <li>- pyruvate-enriched cardioplegia dampens CPB-induced myocardial inflammation</li> <li>- increased GSH/GSSG and TIMP-2 mediate pyruvate's effects</li> </ul>                                                                                                                                                                                    |

|                          |                                                                                                                                    |        |            |           |         |                                                                   |                                                                                                                                                                                                                   |
|--------------------------|------------------------------------------------------------------------------------------------------------------------------------|--------|------------|-----------|---------|-------------------------------------------------------------------|-------------------------------------------------------------------------------------------------------------------------------------------------------------------------------------------------------------------|
| Ko,<br>2009 [34]         | <i>n</i> = 5 Buckberg's cardioplegia<br><i>n</i> = 5 Buckberg's + amrinone cardioplegia<br><i>n</i> = 5 St. Thomas II cardioplegia | 90 min | normotherm | 30 min    | 30 min  | St. Thomas II;<br>Buckberg                                        | - high-dose amrinone with Buckberg's cardioplegia replenished myocardial cAMP and promoted rapid and sustained cardiac functional recovery                                                                        |
| Ryou,<br>2009 [33]       | <i>n</i> = 8 cardioplegia + pyruvate<br><i>n</i> = 8 cardioplegia<br><i>n</i> = 8 control (w/o cardiac arrest and cardioplegia)    | 60 min | n.a.       | 30 min    | 240 min | 4:1<br>blood:crystalloid<br>solution                              | - pyruvate induced EPO expression in the myocardium and activates EPO signaling<br>- intracoronary administration of pyruvate-enriched cardioplegia mobilized a cardioprotective mechanism                        |
| Aarsaether,<br>2009 [27] | <i>n</i> = 7 HTK cardioplegia<br><i>n</i> = 7 St. Thomas II cardioplegia                                                           | 60 min | n.a.       | 20 min    | 240 min | HTK;<br>St. Thomas II                                             | - better preservation of postischemic mechanoenergetic function and lower TnT release with St. Thomas II than with HTK cardioplegia<br>- comparable LV function with St. Thomas II and HTK cardioplegia           |
| Fanneloop,<br>2009 [67]  | <i>n</i> = 8 single dose HTK cardioplegia<br><i>n</i> = 8 repeated oxygenated blood cardioplegia                                   | 60 min | 34 °C      | 20 min    | 180 min | HTK;<br>blood                                                     | - repeated oxygenated blood cardioplegia with better myocardial protection and LV function preservation than single dose HTK cardioplegia                                                                         |
| Jacobson,<br>2007 [29]   | <i>n</i> = 8 St. Thomas II cardioplegia<br><i>n</i> = 8 adenosine-procaine-Mg <sup>2+</sup> cardioplegia                           | 60 min | n.a.       | 20–40 min | 120 min | St. Thomas II;<br>adenosine-procaine-Mg <sup>2+</sup><br>solution | - adenosine instead of supranormal potassium in St. Thomas II cardioplegia gave satisfactory cardiac arrest, improved post cardioplegic LV systolic function and efficiency and attenuated myocardial cell damage |
| Runge,<br>2006 [59]      | <i>n</i> = 6 blood:St. Thomas II cardioplegia + KCl                                                                                | 90 min | normotherm | n.a.      | 180 min | 4:1 oxygenated<br>blood:St.<br>Thomas II                          | - cold blood cardioplegia with more rapid normalization of myocardial metabolism → superior cardiac protection                                                                                                    |

|                      |                                                                                                                           |        |            |        |         |                              |                                                                                                                                                                                                   |
|----------------------|---------------------------------------------------------------------------------------------------------------------------|--------|------------|--------|---------|------------------------------|---------------------------------------------------------------------------------------------------------------------------------------------------------------------------------------------------|
|                      | <i>n</i> = 6 St. Thomas II cardioplegia                                                                                   |        |            |        |         |                              |                                                                                                                                                                                                   |
| Bechtel, 2006 [35]   | <i>n</i> = 5 St. Thomas II cardioplegia + cariporide<br><i>n</i> = 5 St. Thomas II cardioplegia + glucose (placebo)       | 60 min | 32 °C      | 15 min | 180 min | St. Thomas II                | - no effect of i.v. cariporide on LV function or myocardial damage after cardioplegic arrest<br>- cariporide was washed out of the myocardium by repeated application of crystalloid cardioplegia |
| McCann, 2006 [72]    | <i>n</i> = 10 4:1 modified Buckberg cardioplegia<br><i>n</i> = 10 blood cardioplegia                                      | 90 min | normotherm | 30 min | 120 min | 4:1 modified Buckberg; blood | - blood cardioplegia increased survival of hearts after weaning<br>- LV mass and myocardial edema lower after blood cardioplegia<br>- less volume necessary with whole blood cardioplegia         |
| Vähäsilta, 2005 [46] | <i>n</i> = 8 antegrade modified St. Thomas II cardioplegia<br><i>n</i> = 8 retrograde modified St. Thomas II cardioplegia | 30 min | 36 °C      | 30 min | 30 min  | modified St. Thomas II       | - retrograde cardioplegia alone provided inferior cardioprotection against IRI in LV and RV                                                                                                       |
| Khan, 2005 [37]      | <i>n</i> = 7 crystalloid cardioplegia + aprotinin<br><i>n</i> = 7 crystalloid cardioplegia                                | 60 min | n.a.       | 10 min | 90 min  | crystalloid solution         | - aprotinin preserved adherens junctions after regional ischemia and cardioplegic arrest via p38 MAPK pathway → preserved vascular endothelial barrier and reduced tissue edema in the myocardium |
| Klass, 2004 [36]     | <i>n</i> = 7 eniporide before cardioplegia + added to HTK cardioplegia<br><i>n</i> = 7 HTK cardioplegia with eniporide    | 60 min | 28 °C      | 30 min | 120 min | HTK                          | - no effects with the Na <sup>+</sup> /H <sup>+</sup> exchange inhibitor eniporide on cardiac performance and high energy phosphate content                                                       |

|                      |                                                                                                                                   |        |            |           |         |                                                                             |                                                                                                                                                                      |
|----------------------|-----------------------------------------------------------------------------------------------------------------------------------|--------|------------|-----------|---------|-----------------------------------------------------------------------------|----------------------------------------------------------------------------------------------------------------------------------------------------------------------|
|                      | <i>n</i> = 7 HTK cardioplegia w/o eniporide                                                                                       |        |            |           |         |                                                                             |                                                                                                                                                                      |
| Sayk, 2004 [56]      | <i>n</i> = 15 St. Thomas II cardioplegia<br><i>n</i> = 7 Buckberg cardioplegia<br><i>n</i> = 5 control (sternotomy)               | 60 min | 32 °C      | n.a.      | 180 min | St. Thomas II; Buckberg                                                     | - subendocardial Purkinje fibers much more vulnerable than working myocardium to IRI<br>- Purkinje fiber damage was due to necrosis rather than apoptosis            |
| Steensrud, 2004 [44] | <i>n</i> = 8 modified St. Thomas I cardioplegia<br><i>n</i> = 8 0.9% NaCl + nicorandil + Mg <sup>2+</sup> + procaine cardioplegia | 60 min | normotherm | 20–40 min | 120 min | modified St. Thomas I; 0.9% NaCl + nicorandil + Mg <sup>2+</sup> + procaine | - better contractility and improved functional recovery with nicorandil-containing cardioplegia                                                                      |
| Khan, 2004 [38]      | <i>n</i> = 6 crystalloid cardioplegia + aprotinin<br><i>n</i> = 6 crystalloid cardioplegia                                        | 60 min | n.a.       | 10 min    | 90 min  | crystalloid solution                                                        | - aprotinin reduces IRI                                                                                                                                              |
| Fischer, 2003 [73]   | <i>n</i> = 13 HTK cardioplegia                                                                                                    | 60 min | 28 °C      | 30 min    | 90 min  | HTK                                                                         | - cardioplegic arrest initiated apoptosis in myocardial epithelium and myocytes<br>- apoptosis signal pathway activation not mediated by caspase-3 activation        |
| Steensrud, 2003 [39] | <i>n</i> = 7 crystalloid cardioplegia<br><i>n</i> = 7 blood cardioplegia<br><i>n</i> = 7 blood cardioplegia + nicorandil          | 60 min | 18 °C      | 20–40 min | 120 min | crystalloid solution; hyperkalemic blood solution with and w/o nicorandil   | - cold blood cardioplegia + nicorandil preserved LV contractility and myocardial energetics<br>- better diastolic function with cold blood cardioplegia + nicorandil |
| Elvenes, 2002 [65]   | <i>n</i> = 7 cold St. Thomas II<br><i>n</i> = 7 warm blood cardioplegia                                                           | 60 min | 32–37 °C   | 60 min    | none    | St. Thomas II                                                               | - St. Thomas II cardioplegia reduced the infarction size about 10% compared to control                                                                               |

|                      |                                                                                                                                                                           |         |              |         |         |                        |                                                                                                                                                                                                                                                                                   |
|----------------------|---------------------------------------------------------------------------------------------------------------------------------------------------------------------------|---------|--------------|---------|---------|------------------------|-----------------------------------------------------------------------------------------------------------------------------------------------------------------------------------------------------------------------------------------------------------------------------------|
|                      | <i>n</i> = myocardial ischemia (control)                                                                                                                                  |         |              |         |         |                        | <ul style="list-style-type: none"> <li>- warm blood cardioplegia reduced the infarction size by more than 50% compared to St. Thomas II cardioplegia</li> <li>- functional cardiac impairment with both cardioplegic strategies during the first 60 min of reperfusion</li> </ul> |
| Vähäsilta, 2001 [30] | <i>n</i> = 7 modified St. Thomas II cardioplegia + adenosine<br><i>n</i> = 6 modified St. Thomas II cardioplegia                                                          | 30 min  | 36 °C        | 90 min  | none    | modified St. Thomas II | <ul style="list-style-type: none"> <li>- cardiomyocyte apoptosis involved in IRI</li> <li>- no effects of adenosine addition to IRI</li> </ul>                                                                                                                                    |
| Uotila, 2001 [47]    | <i>n</i> = 5 modified St. Thomas II cardioplegia<br><i>n</i> = 5 sham operation<br><i>n</i> = 6 control (no operation)                                                    | 30 min  | normotherm   | 90 min  | none    | modified St. Thomas II | <ul style="list-style-type: none"> <li>- stimulation of COX-2 gene expression in the ventricular myocardium after CPB</li> </ul>                                                                                                                                                  |
| Eising, 2000 [74]    | <i>n</i> = 26 HTK cardioplegia                                                                                                                                            | 90 min  | 36.5–38.5 °C | 30 min  | 300 min | HTK                    | <ul style="list-style-type: none"> <li>- hemofiltration was ineffective in improving cardiac function or reducing the inflammatory response of CPB</li> </ul>                                                                                                                     |
| Powell, 1997 [41]    | <i>n</i> = 30 St. Thomas II cardioplegia with zinc-bis-histidinate<br><i>n</i> = 30 St. Thomas II cardioplegia                                                            | 60 min  | 28 °C        | 180 min | none    | St. Thomas II          | <ul style="list-style-type: none"> <li>- zinc-bis-histidinate addition to cardioplegia was effective for myocardial preservation</li> </ul>                                                                                                                                       |
| Pathi, 1997 [66]     | <i>n</i> = 6 30 min CPB<br><i>n</i> = 6 30 min CPB + 90 min St. Thomas II cardioplegia<br><i>n</i> = 6 30 min CPB + 90 min St. Thomas II cardioplegia + blood reperfusion | 120 min | 28 °C        | 30 min  | none    | St. Thomas II          | <ul style="list-style-type: none"> <li>- microvascular changes after CPB partially reversed by 30 min reperfusion</li> <li>- leukocyte depletion did not ameliorate reversion processes</li> </ul>                                                                                |

|                     |                                                                                                                                                                                                                 |           |          |        |        |                                                  |                                                                                                                                                                                                 |
|---------------------|-----------------------------------------------------------------------------------------------------------------------------------------------------------------------------------------------------------------|-----------|----------|--------|--------|--------------------------------------------------|-------------------------------------------------------------------------------------------------------------------------------------------------------------------------------------------------|
|                     | <i>n</i> = 6 30 min CPB + 90 min St. Thomas II cardioplegia + leukocyte-depleted blood reperfusion                                                                                                              |           |          |        |        |                                                  |                                                                                                                                                                                                 |
| Valen, 1997 [75]    | <i>n</i> = 8 St. Thomas II cardioplegia                                                                                                                                                                         | 120 min   | 32–34 °C | 30 min | none   | St. Thomas II                                    | - release of TnT, t-PA and histamin after 120 min cardioplegia<br>- different kinetics of TnT, t-PA and histamin release may indicate different affection of the myocardium and the endothelium |
| Wang, 1997 [76]     | <i>n</i> = 6 crystalloid cardioplegia<br><i>n</i> = 6 crystalloid cardioplegia + reperfusion<br><i>n</i> = 6 blood cardioplegia<br><i>n</i> = 6 blood + reperfusion<br><i>n</i> = 6 sternotomy w/o cardioplegia | 60 min    | 30 °C    | 15 min | 45 min | crystalloid solution;<br>blood                   | - comparable preservation of myocardial contractility or perfusion between crystalloid and blood cardioplegia                                                                                   |
| Tofukuji, 1997 [45] | <i>n</i> = 12 hyper-Mg crystalloid cardioplegia<br><i>n</i> = 12 hyper-K crystalloid cardioplegia                                                                                                               | 60 min    | n.a.     | 60 min | none   | crystalloid solution                             | - hyper-Mg cardioplegia was superior to hyper-K cardioplegia in preserving coronary microcirculation                                                                                            |
| Irtun, 1997 [77]    | <i>n</i> = 7 St. Thomas I cardioplegia at 75 mmHg<br><i>n</i> = 7 St. Thomas I cardioplegia at 175 mmHg                                                                                                         | 120 min   | 26 °C    | 60 min | none   | St. Thomas I                                     | - high cardioplegic solution delivery pressure caused poorer postischemic recovery than moderate pressure<br>- cardioplegic solution delivery at 175 mmHg was harmful to pig heart              |
| Curro, 1997 [48]    | group 1: St. Thomas I cardioplegia                                                                                                                                                                              | 30–36 min | 28 °C    | 30 min | none   | St. Thomas I;<br>1:1 St. Thomas I : blood; blood | - intermittent warm blood cardioplegia superior to cold crystalloid cardioplegia regarding myocardial preservation                                                                              |



|  |                                                   |  |  |  |  |  |  |
|--|---------------------------------------------------|--|--|--|--|--|--|
|  | group 2: 1:1 St. Thomas I :<br>blood cardioplegia |  |  |  |  |  |  |
|  | group 3: blood cardioplegia                       |  |  |  |  |  |  |

Footnote Table S1: AKI, acute kidney injury; cAMP, cyclic adenosin monophosphate; Ca<sup>2+</sup>, calcium; COX-2, cyclooxygenase-2; CPB, cardiopulmonary bypass; CsA, cyclosporine A; EPO, erythropoietin; GBR, germinated brown rice; GSH, glutathione; GSSG, glutathione disulfide; HTK, histidin-tryptophan-ketoglutarat (Custodiol); HTK-N, histidin-tryptophan-ketoglutarat-N (Custodiol-N); H<sup>+</sup>, hydrogen; H<sub>2</sub>S, hydrogen sulfide; IRI, ischemia reperfusion injury; i.v., intravenous; K/K<sup>+</sup>, potassium; KCl, potassium chloride; LV, left ventricle; Mg/Mg<sup>2+</sup>, magnesium; MgCl<sub>2</sub>, magnesium chloride; Na/Na<sup>2+</sup>, sodium; RV, right ventricle; ROS, reactive oxygen species; TIMP-2, metalloproteinase-2; TnT, troponin T; t-PA, tissue plasminogen activator; w/o, without.

**Table S2.** Overview about investigations of cardioplegic solutions in pediatric pig models.

| Reference           | Study Groups                                                                                                                                                                       | Ischemia   | Ischemic Temperature | On-pump Reperfusion | Off-Pump Recovery | Cardioplegic Solution          | Main Findings                                                                                                                           |
|---------------------|------------------------------------------------------------------------------------------------------------------------------------------------------------------------------------|------------|----------------------|---------------------|-------------------|--------------------------------|-----------------------------------------------------------------------------------------------------------------------------------------|
| Nakao, 2021 [60]    | n = 7 Del Nido cardioplegia<br>n = 7 modified Del Nido cardioplegia                                                                                                                | 90 min     | 30 °C                | 30 min              | 40 min            | Del Nido;<br>modified Del Nido | - LV function and recovery after prolonged global ischemia comparable between original and modified Del Nido cardioplegia               |
| Nakao, 2020 [61]    | n = 7 Del Nido cardioplegia with 90 min global ischemia<br>n = 7 Del Nido cardioplegia with 120 min global ischemia<br>n = 7 control with CPB only                                 | 90-120 min | 30 °C                | 30 min              | 30 min            | Del Nido                       | - excellent LV compliance after 120 min ischemia with Del Nido cardioplegia                                                             |
| Abe, 2017 [62]      | n = 6 remote preconditioning<br>n = 6 terminal warm blood cardioplegia<br>n = 6 remote preconditioning + terminal warm blood cardioplegia<br>n = 6 simple aortic unclamp (control) | 120 min    | normotherm           | 30 min              | 30-60 min         | St. Thomas II                  | - remote preconditioning with synergistic cardioprotection and LV functional recovery to warm blood cardioplegia                        |
| Kajimoto, 2016 [68] | n = 7 St. Thomas cardioplegia<br>n = 7 St. Thomas cardioplegia + selective cerebral perfusion                                                                                      | 60 min     | 18 °C                | 45 min              | 60 min            | St. Thomas                     | - selective cerebral perfusion prevents abnormalities in glutamate/glutamine/GABA cycling, which are induced by St. Thomas cardioplegia |

|                       |                                                                                                                |         |       |         |         |                                              |                                                                                                                                                                                                                                       |
|-----------------------|----------------------------------------------------------------------------------------------------------------|---------|-------|---------|---------|----------------------------------------------|---------------------------------------------------------------------------------------------------------------------------------------------------------------------------------------------------------------------------------------|
| Chen,<br>2015 [50]    | n = 5 HTK cardioplegia<br>n = 5 HTK cardioplegia + ebselene<br>n = 5 CPB w/o cross clamping                    | 120 min | 30 °C | n.a.    | 120 min | HTK                                          | - improved antioxidant defense, reduced myocyte apoptosis, better preserved mitochondrial structure, better myocardial protection with HTK + ebselene cardioplegia                                                                    |
| Janssen,<br>2015 [58] | n = 10 HTK cardioplegia<br>n = 10 beating heart control                                                        | 60 min  | 28 °C | 120 min | 6–8 h   | HTK                                          | - beating heart technique improved contractility<br>- comparable ischemic damage<br>- earlier rise of TnT levels after beating heart surgery<br>- more fluctuation of serum electrolytes with HTK cardioplegia                        |
| Münch,<br>2014 [49]   | n = 8 modified Calafiore cardioplegia<br>n = 12 HTK cardioplegia                                               | 60 min  | 28 °C | 120 min | none    | HTK;<br>modified Calafiore                   | - modified Calafiore cardioplegia with comparable myocardial protection as HTK cardioplegia<br>- modified Calafiore cardioplegia with superior contractility post CPB                                                                 |
| Chen,<br>2013 [69]    | n = 7 single dose HTK cardioplegia<br>n = 7 multi-dose St. Thomas cardioplegia<br>n = 7 CPB w/o cross clamping | 120 min | 25 °C | n.a.    | 180 min | HTK;<br>cold 1:1 St. Thomas/oxygenated blood | - HTK with sufficient cardiac protection for 2 hrs of ischemia<br>- HTK with equivalent myocardial protection to multidose cold blood cardioplegia                                                                                    |
| Liuba,<br>2013 [54]   | n = 10 modified St. Thomas cardioplegia + CsA<br>n = 10 control w/o cardioplegic solution                      | 45 min  | 32 °C | none    | none    | blood with modified St. Thomas 4:1           | - St. Thomas cardioplegia associated with abnormalities in coronary vasomotor tone and receptor-related flow regulation<br>- no protective effect on coronary index or arrhythmia vulnerability after CPB with CsA-added cardioplegia |

|                      |                                                                                                                                                                                                                                                                                      |         |          |           |         |               |                                                                                                                                                                                                                                              |
|----------------------|--------------------------------------------------------------------------------------------------------------------------------------------------------------------------------------------------------------------------------------------------------------------------------------|---------|----------|-----------|---------|---------------|----------------------------------------------------------------------------------------------------------------------------------------------------------------------------------------------------------------------------------------------|
| Kinouchi, 2012 [51]  | n = 5 blood cardioplegia<br>n = 5 blood cardioplegia + olprinone<br>n = 5 uncontrolled reperfusion w/o blood cardioplegia                                                                                                                                                            | 90 min  | n.a.     | 30 min    | 30 min  | blood         | - blood cardioplegia + olprinone reduced myocardial reperfusion injury by reducing oxidant-mediated peroxidation<br>- blood cardioplegia accelerated prompt and persistent LV functional recovery with suppression of reperfusion arrhythmia |
| Shinohara, 2011 [78] | n = 6 St. Thomas II cardioplegia + 6 cycles unclamping/declamping of the aorta prior to reperfusion<br>n = 6 St. Thomas II cardioplegia + 10 cycles unclamping/declamping of the aorta prior to reperfusion<br>n = 6 St. Thomas II cardioplegia + simple removal of aorta crossclamp | 90 min  | n.a.     | 30 min    | none    | St. Thomas II | - postconditioning algorithms (unclamping and declamping cycles) promoted functional recovery after cardioplegic arrest                                                                                                                      |
| Ando, 2008 [53]      | n = 7 St. Thomas II cardioplegia + sivelestat<br>n = 7 St. Thomas II cardioplegia                                                                                                                                                                                                    | 120 min | n.a.     | n.a.      | 24 h    | St. Thomas II | - intraoperative administration of sivelestat reduced neutrophil induction and activation in lung and improved oxygenation after CPB                                                                                                         |
| Oka, 2008 [79]       | n = 5 St. Thomas II cardioplegia<br>n = St. Thomas II cardioplegia + CsA pretreatment<br>n = 5 non-CPB control                                                                                                                                                                       | 60 min  | 28-30 °C | 10–20 min | 360 min | St. Thomas II | - CsA pretreatment prevented postcardioplegia alterations in mitochondrial structure and function                                                                                                                                            |
| Wang, 2006 [52]      | n = 5 St. Thomas II cardioplegia<br>n = 5 St. Thomas II cardioplegia + diazoxide                                                                                                                                                                                                     | 60 min  | 28-30 °C | 10–20 min | 6 h     | St. Thomas II | - early apoptotic signaling events not prevented by diazoxide addition<br>- diazoxide added to St. Thomas II cardioplegic solution protected mitochondrial structure and functional integrity                                                |

|                    |                                                                                                                                                                                                                                           |           |       |        |      |                          |                                                                                                                                                                                         |
|--------------------|-------------------------------------------------------------------------------------------------------------------------------------------------------------------------------------------------------------------------------------------|-----------|-------|--------|------|--------------------------|-----------------------------------------------------------------------------------------------------------------------------------------------------------------------------------------|
| Jones, 2002 [55]   | n = 4 10 min cold crystalloid cardioplegia<br>n = 6 30 min cold crystalloid cardioplegia<br>n = 5 10 min warm crystalloid cardioplegia<br>n = 5 10 min warm circulatory arrest<br>n = 6 30 min cold crystalloid cardioplegia + Adeno-βGal | 10–30 min | n.a.  | n.a.   | 48 h | crystalloid cardioplegia | - adenoviral based gene transfer not impaired by lower temperatures associated with cold crystalloid cardioplegic arrest<br>- gene transfer is possible during cardiac surgery with CPB |
| Bolling, 1997 [80] | n = 5 blood cardioplegia<br>n = 5 St. Thomas II cardioplegia<br>n = 5 60 min hypoxia + blood cardioplegia<br>n = 5 60 min hypoxia + St. Thomas II cardioplegia                                                                            | 70 min    | 25 °C | 30 min | 6 h  | blood;<br>St. Thomas II  | - blood and St. Thomas II cardioplegia is cardioprotective and not compromised by preoperative hypoxia<br>- blood cardioplegia is superior to St. Thomas cardioplegia                   |

Footnote Table S2: Adeno-βgal, β-galactosidase transgene; CPB, cardiopulmonary bypass; CsA, cyclosporine A; GABA, γ-aminobutyric acid; HTK, histidin-tryptophan-ketoglutarat (Custodiol); KCl, potassium chloride; LV, left ventricle; w/o, without.

## References

72. McCann, U.G.; Lutz, C.J.; Picone, A.L.; Searles, B.; Gatto, L.A.; Dilip, K.A.; Nieman, G.F. Whole blood cardioplegia (minicardioplegia) reduces myocardial edema after ischemic injury and cardiopulmonary bypass. *J. Extra-Corpor. Technol.* **2006**, *38*, 14–21.
73. Fischer, U.M.; Klass, O.; Stock, U.; Easo, J.; Geissler, H.J.; Fischer, J.H.; Bloch, W.; Mehlhorn, U. Cardioplegic arrest induces apoptosis signal-pathway in myocardial endothelial cells and cardiac myocytes. *Eur. J. Cardio-Thorac. Surg.* **2003**, *23*, 984–990.
74. Eisng, G.P.; Schad, H.; Heimisch, W.; Gippner-Steppert, C.; Jochum, M.; Braun, S.L.; Mendler, N.; Meisner, H.; Lange, R. Effect of Cardiopulmonary Bypass and Hemofiltration on Plasma Cytokines and Protein Leakage in Pigs. *Thorac. Cardiovasc. Surg.* **2000**, *48*, 86–92.
75. Valen, G.; Sellei, P.; Owall, A.; Eriksson, E.; Kallner, A.; Waldum, H.; Risberg, B.; Vaage, J. Release of markers of myocardial and endothelial injury following cold cardioplegic arrest in pigs. *Scand. Cardiovasc. J.* **1997**, *31*, 45–50.
76. Wang, S.Y.; Stamler, A.; Tofukuji, M.; E Deuson, B.T.; Sellke, F.W. Effects of Blood and Crystalloid Cardioplegia on Adrenergic and Myogenic Vascular Mechanisms. *Ann. Thorac. Surg.* **1997**, *63*, 41–49.
77. Irtun, O.; Sørli, D. High cardioplegic perfusion pressure entails reduced myocardial recovery. *Eur. J. Cardio-Thorac. Surg.* **1997**, *11*, 358–362.
78. Shinohara, G.; Morita, K.; Nagahori, R.; Koh, Y.; Kinouchi, K.; Abe, T.; Hashimoto, K. Ischemic postconditioning promotes left ventricular functional recovery after cardioplegic arrest in an in vivo piglet model of global ischemia reperfusion injury on cardiopulmonary bypass. *J. Thorac. Cardiovasc. Surg.* **2011**, *142*, 926–932.

- 
79. Oka, N.; Wang, L.; Mi, W.; Zhu, W.; Honjo, O.; Caldarone, C.A. Cyclosporine A prevents apoptosis-related mitochondrial dysfunction after neonatal cardioplegic arrest. *J. Thorac. Cardiovasc. Surg.* **2008**, *135*, 123–130.
  80. Bolling, K.; Kronon, M.; Allen, B.S.; Wang, T.; Ramon, S.; Feinberg, H. Myocardial protection in normal and hypoxically stressed neonatal hearts: The superiority of blood versus crystalloid cardioplegia. *J. Thorac. Cardiovasc. Surg.* **1997**, *113*, 994–1005.
